# Supplementary material for: High temperature ethylene polymerization catalyzed by titanium(iv) complexes with tetradentate aminophenolate ligands in cis-O, N, N chelating mode
Source: Royal Society of Chemistry journal article supplement (doi:10.1039/c4dt01122h), 2014-01-01
Supplement: c4dt01122h1.pdf [file c4dt01122h1.pdf]

## Supporting information for

# High Temperature Ethylene Polymerization Catalyzed by Titanium (IV) Complexes with Tetradentate Aminophenolate Ligands in *cis*-O, N, N Chelating Mode

Ruiguo Zhao, Taotao Liu, Liying Wang, and Haiyan Ma\*

Shanghai Key Laboratory of Functional Materials Chemistry and Laboratory of  
Organometallic Chemistry, East China University of Science and Technology, 130  
Meilong Road, Shanghai 200237, P. R. China

## 1 X-ray diffraction studies

**Table S1.** Summary of crystallographic data for complexes **2a**, **9a**, **8d** and **5e**

|                                                              | <b>2a</b>                                                                        | <b>9a</b>                                                                        | <b>8d</b>                                                                                                     | <b>5e</b>                                                          |
|--------------------------------------------------------------|----------------------------------------------------------------------------------|----------------------------------------------------------------------------------|---------------------------------------------------------------------------------------------------------------|--------------------------------------------------------------------|
| Formula                                                      | C <sub>27</sub> H <sub>41</sub> Cl <sub>3</sub> N <sub>2</sub> O <sub>2</sub> Ti | C <sub>29</sub> H <sub>45</sub> Cl <sub>3</sub> N <sub>2</sub> O <sub>2</sub> Ti | C <sub>38</sub> H <sub>46</sub> Br <sub>4</sub> Cl <sub>4</sub> N <sub>4</sub> O <sub>5</sub> Ti <sub>2</sub> | C <sub>32</sub> H <sub>53</sub> ClN <sub>2</sub> O <sub>5</sub> Ti |
| FW                                                           | 579.85                                                                           | 607.92                                                                           | 1195.96                                                                                                       | 629.11                                                             |
| T / K                                                        | 293(2)                                                                           | 293(2)                                                                           | 293(2)                                                                                                        | 293(2)                                                             |
| Crystal system                                               | Orthorhombic                                                                     | Monoclinic                                                                       | Triclinic                                                                                                     | Monoclinic                                                         |
| Space group                                                  | Pca2(1)                                                                          | C2/c                                                                             | P-1                                                                                                           | P2(1)/n                                                            |
| <i>a</i> / Å                                                 | 17.9918(16)                                                                      | 31.567(14)                                                                       | 12.5385(17)                                                                                                   | 12.595(4)                                                          |
| <i>b</i> / Å                                                 | 12.0283(11)                                                                      | 12.607(5)                                                                        | 16.754(2)                                                                                                     | 13.269(4)                                                          |
| <i>c</i> / Å                                                 | 22.162(2)                                                                        | 24.650(10)                                                                       | 18.355(2)                                                                                                     | 21.982(7)                                                          |
| $\alpha$ / °                                                 | 90                                                                               | 90                                                                               | 99.214(3)                                                                                                     | 90                                                                 |
| $\beta$ / °                                                  | 90                                                                               | 127.231                                                                          | 93.923(3)                                                                                                     | 104.538(4)                                                         |
| $\gamma$ / °                                                 | 90                                                                               | 90                                                                               | 103.434(3)                                                                                                    | 90                                                                 |
| Volume / Å <sup>3</sup>                                      | 4796.0(7)                                                                        | 7810(6)                                                                          | 3679.6(8)                                                                                                     | 3556(2)                                                            |
| <i>Z</i>                                                     | 4                                                                                | 8                                                                                | 2                                                                                                             | 4                                                                  |
| <i>D</i> <sub>calc</sub> / Mg m <sup>-3</sup>                | 1.186                                                                            | 1.031                                                                            | 1.412                                                                                                         | 1.175                                                              |
| Abs coeff / mm <sup>-1</sup>                                 | 0.383                                                                            | 0.446                                                                            | 2.581                                                                                                         | 0.353                                                              |
| <i>F</i> (000)                                               | 1824                                                                             | 2560                                                                             | 1588                                                                                                          | 1352                                                               |
| Crystal size / mm                                            | 0.341 × 0.215 × 0.056                                                            | 0.25 × 0.22 × 0.20                                                               | 0.311 × 0.145 × 0.056                                                                                         | 0.12 × 0.10 × 0.06                                                 |
| 2 $\theta$ range / °                                         | 1.69 to 25.50                                                                    | 1.62 to 27.50                                                                    | 1.68 to 25.50                                                                                                 | 1.70 to 25.01                                                      |
| Reflns collected / unique                                    | 27081 / 8516                                                                     | 8551 / 8551                                                                      | 21588 / 13665                                                                                                 | 14395 / 6253                                                       |
| R(int)                                                       | 0.1323                                                                           | 0.0000                                                                           | 0.0601                                                                                                        | 0.0542                                                             |
| Data / restraints / para                                     | 8516 / 159 / 501                                                                 | 8551 / 6 / 334                                                                   | 13665 / 5 / 578                                                                                               | 6253 / 6 / 379                                                     |
| Goodness-of-fit on <i>F</i> <sup>2</sup>                     | 0.960                                                                            | 0.996                                                                            | 0.994                                                                                                         | 0.954                                                              |
| <i>R</i> <sub>1</sub> [ <i>I</i> > 2 $\sigma$ ( <i>I</i> )]  | 0.0782                                                                           | 0.0840                                                                           | 0.0802                                                                                                        | 0.0671                                                             |
| <i>wR</i> <sub>2</sub> [ <i>I</i> > 2 $\sigma$ ( <i>I</i> )] | 0.1640                                                                           | 0.2359                                                                           | 0.2050                                                                                                        | 0.1849                                                             |
| Largest peak and hole / e Å <sup>-3</sup>                    | 0.338 and -0.296                                                                 | 1.547 and -0.632                                                                 | 0.967 and -0.538                                                                                              | 0.614 and -0.380                                                   |

## 2 $^1\text{H}$ NMR and $^{13}\text{C}$ NMR spectra of the titanium and zirconium complexes

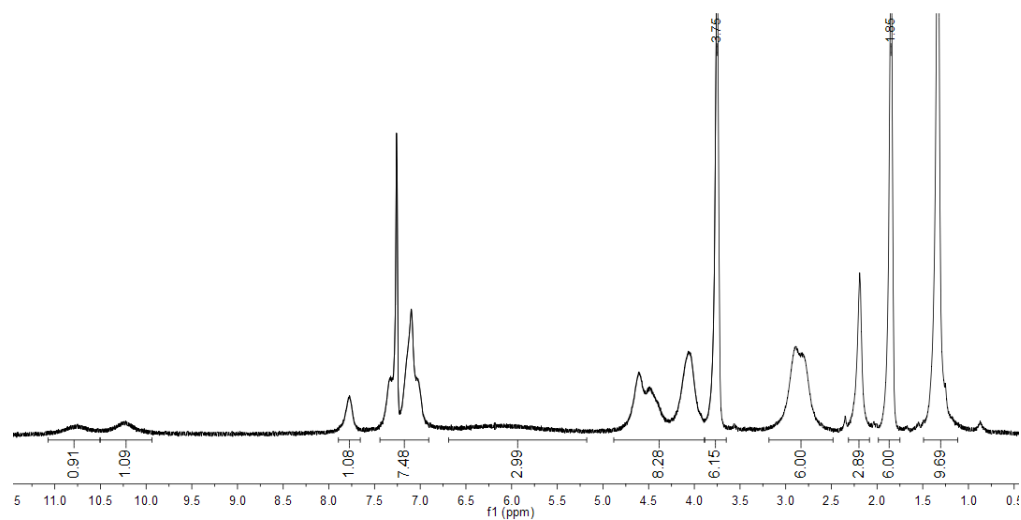

**Fig. S1.**  $^1\text{H}$  NMR spectrum of **1c** ( $\text{CDCl}_3$ , 400 MHz).

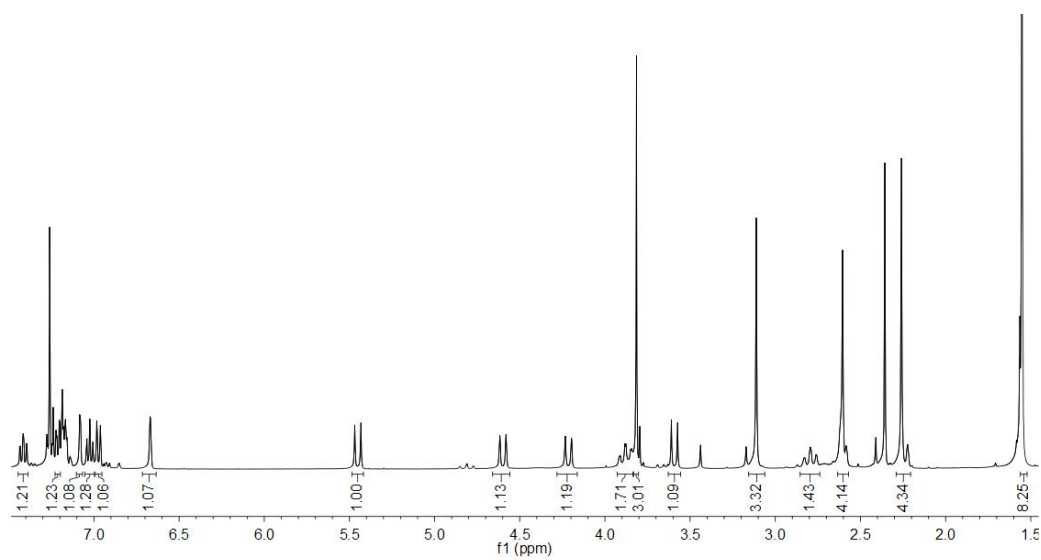

**Fig. S2.**  $^1\text{H}$  NMR spectrum of **1a** ( $\text{CDCl}_3$ , 400 MHz).

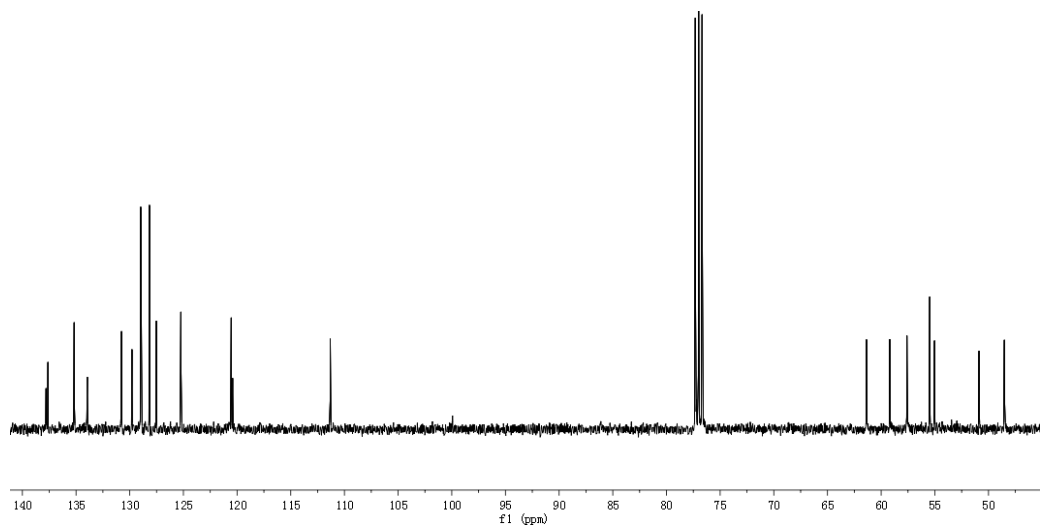

**Fig. S3.**  $^{13}\text{C}$  NMR spectrum of **1a** ( $\text{CDCl}_3$ , 100 MHz).

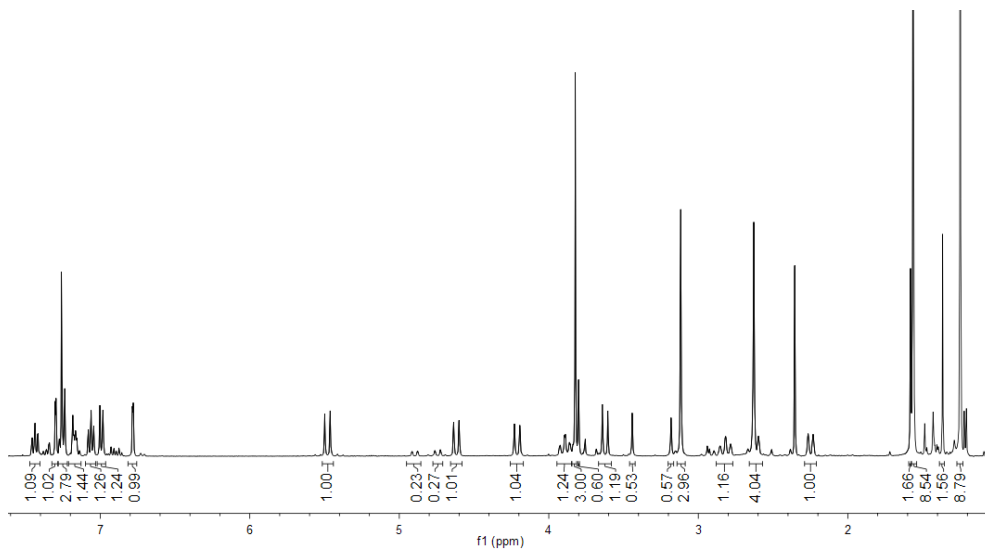

**Fig. S4.**  $^1\text{H}$  NMR spectrum of **2a** ( $\text{CDCl}_3$ , 400 MHz).

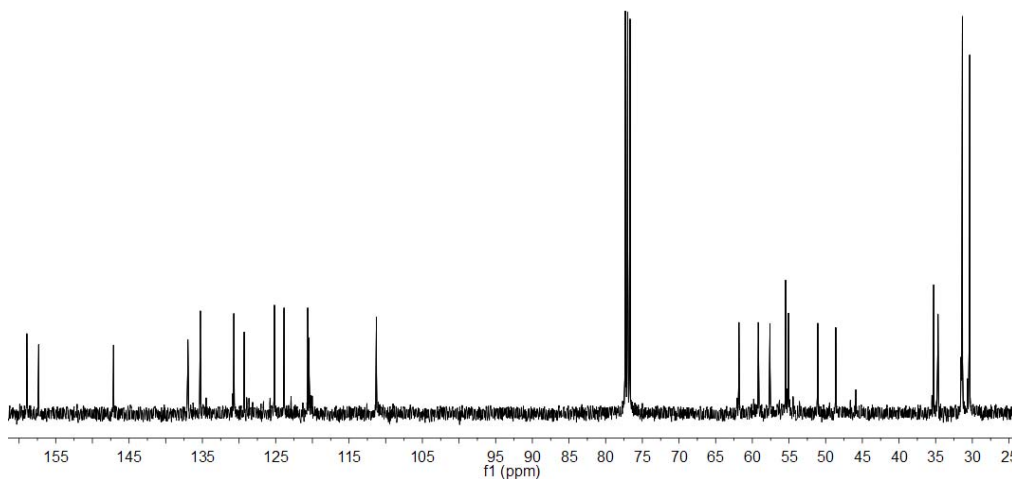

**Fig. S5.**  $^{13}\text{C}$  NMR spectrum of **2a** ( $\text{CDCl}_3$ , 100 MHz).

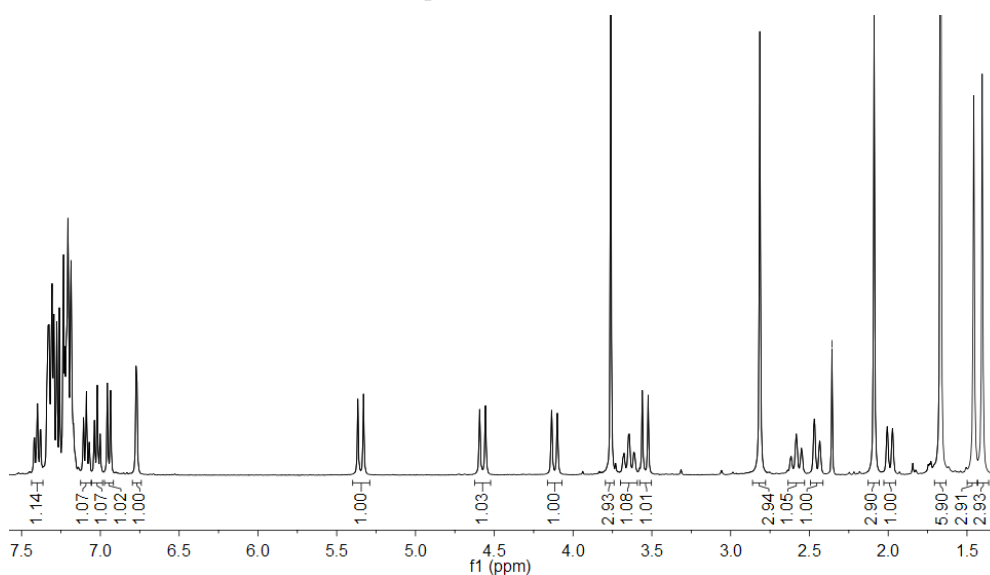

**Fig. S6.**  $^1\text{H}$  NMR spectrum of **3a** ( $\text{CDCl}_3$ , 400 MHz).

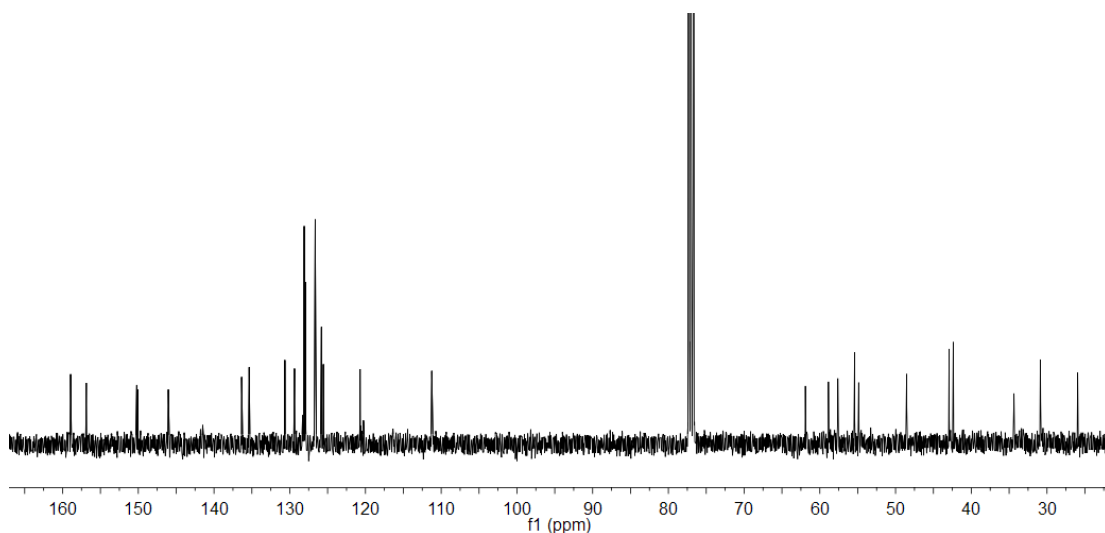

**Fig. S7.**  $^{13}\text{C}$  NMR spectrum of **3a** ( $\text{CDCl}_3$ , 100 MHz).

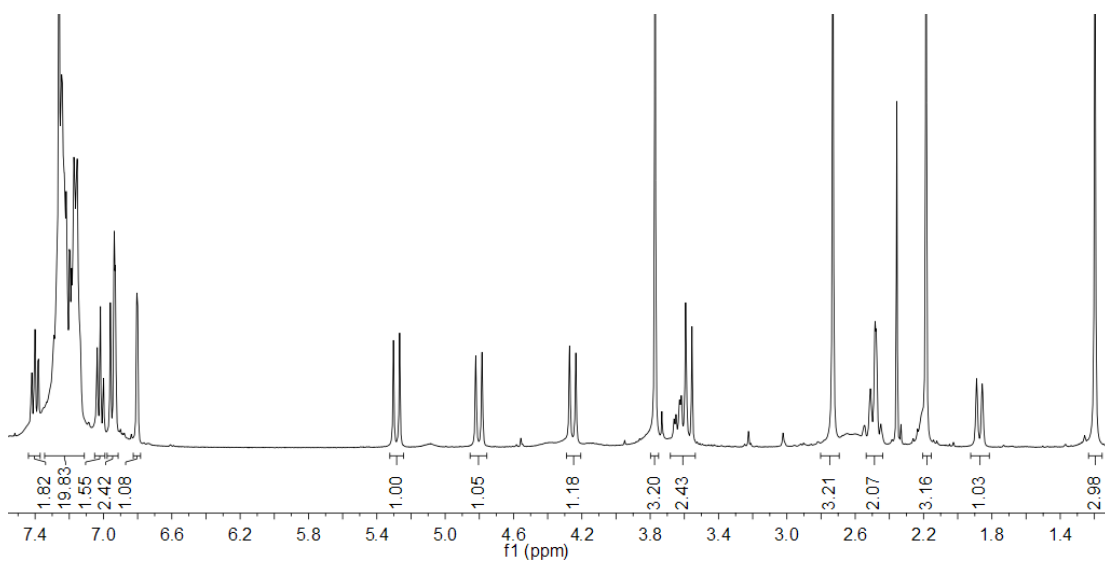

**Fig. S8.**  $^1\text{H}$  NMR spectrum of **4a** ( $\text{CDCl}_3$ , 400 MHz).

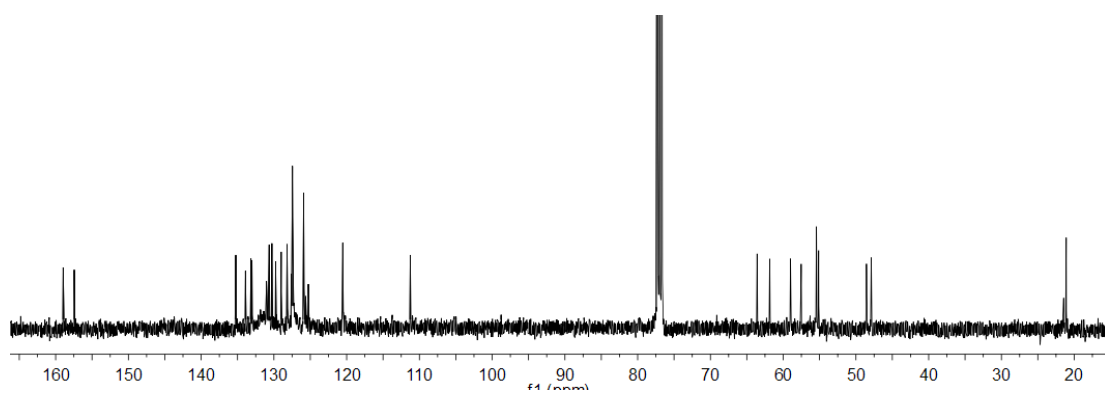

**Fig. S9.**  $^{13}\text{C}$  NMR spectrum of **4a** ( $\text{CDCl}_3$ , 100 MHz).

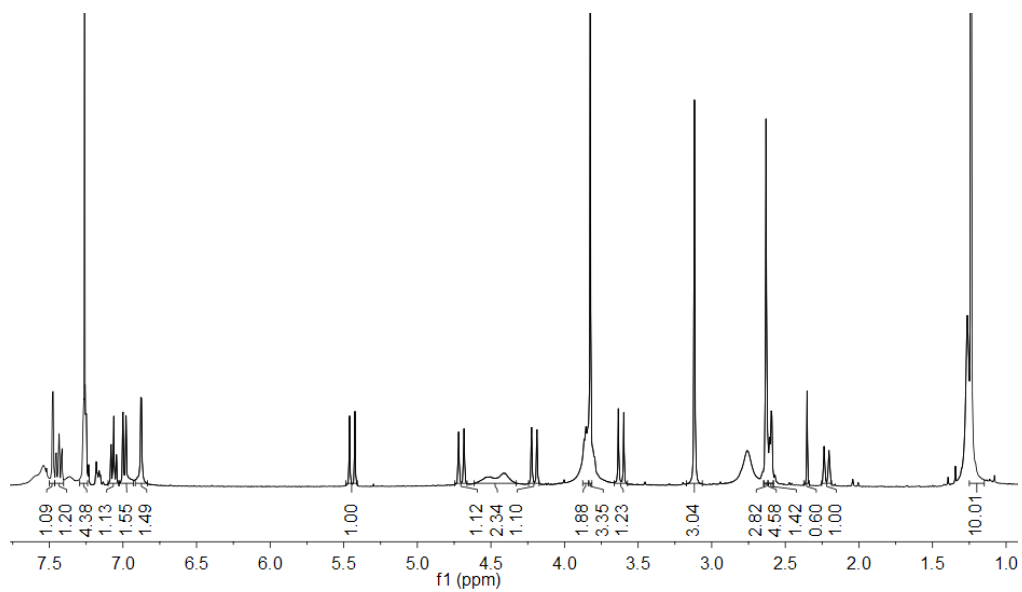

**Fig. S10.**  $^1\text{H}$  NMR spectrum of **6a** ( $\text{CDCl}_3$ , 400 MHz).

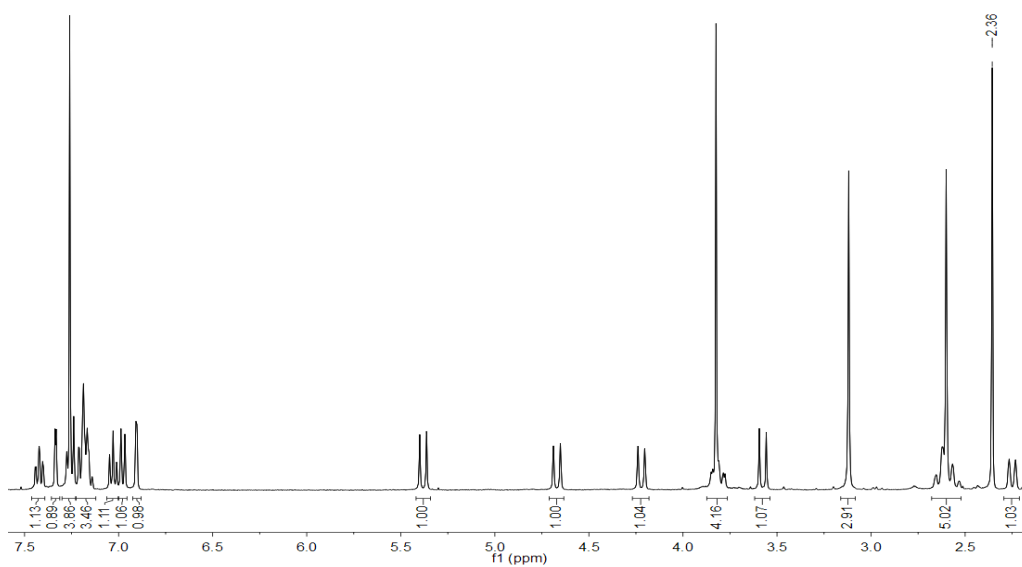

**Fig. S11.**  $^1\text{H}$  NMR spectrum of **7a** ( $\text{CDCl}_3$ , 400 MHz).

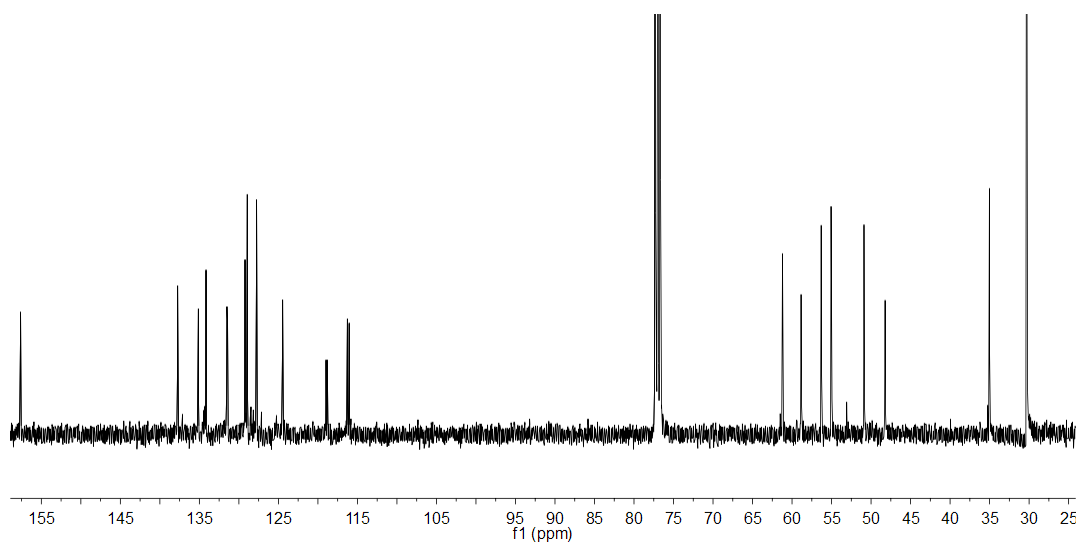

**Fig. S12.**  $^{13}\text{C}$  NMR spectrum of **7a** (CDCl<sub>3</sub>, 100 MHz).

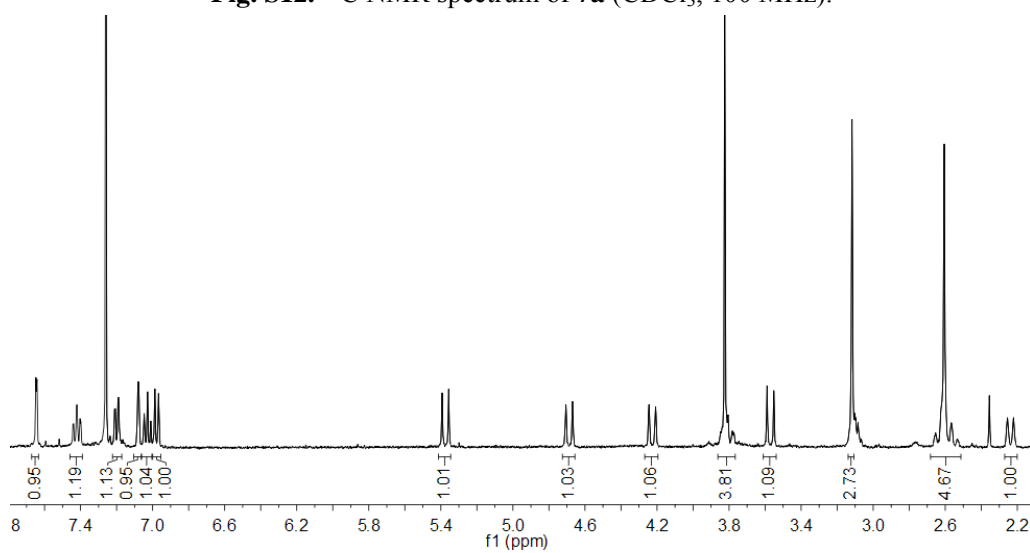

**Fig. S13.**  $^1\text{H}$  NMR spectrum of **8a** (CDCl<sub>3</sub>, 400 MHz).

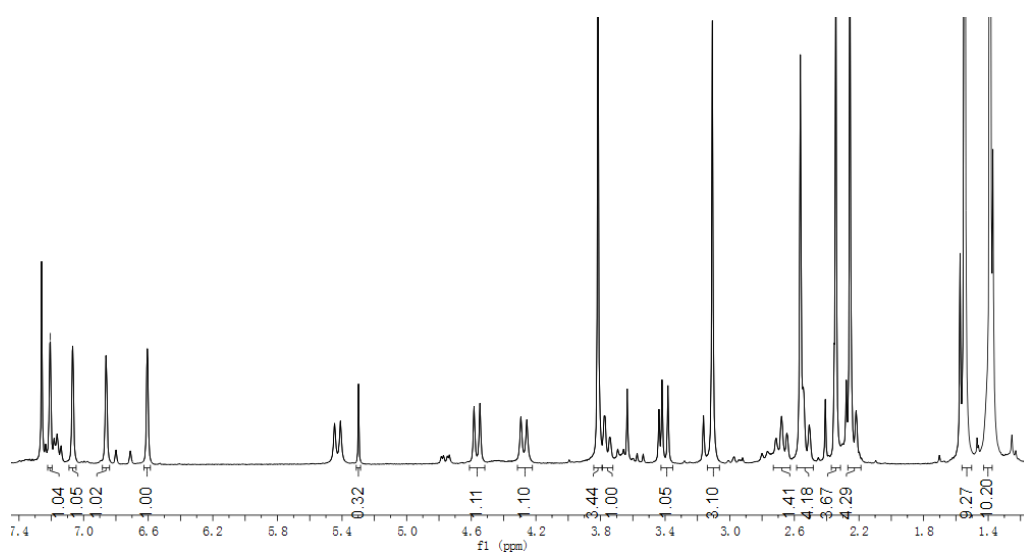

**Fig. S14.**  $^1\text{H}$  NMR spectrum of **9a** (CDCl<sub>3</sub>, 400 MHz).

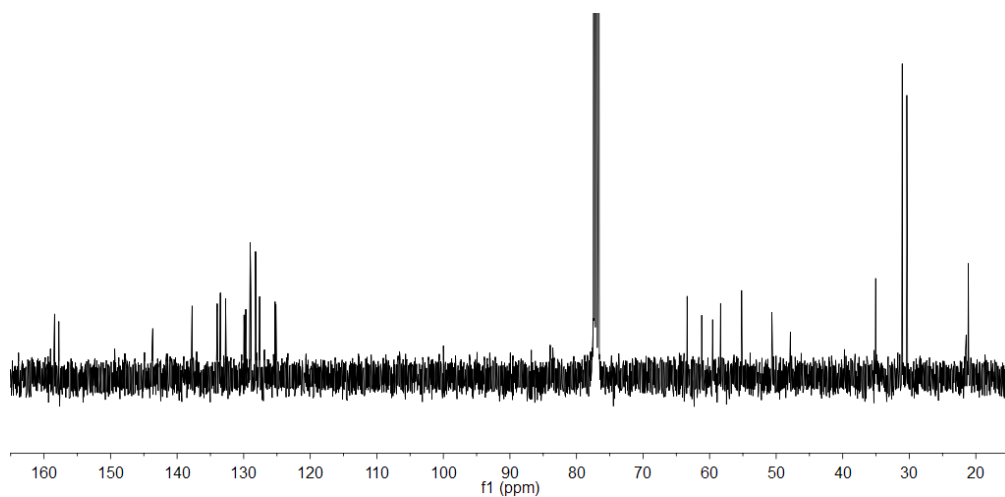

Fig. S15.  $^{13}\text{C}$  NMR spectrum of **9a** ( $\text{CDCl}_3$ , 100 MHz).

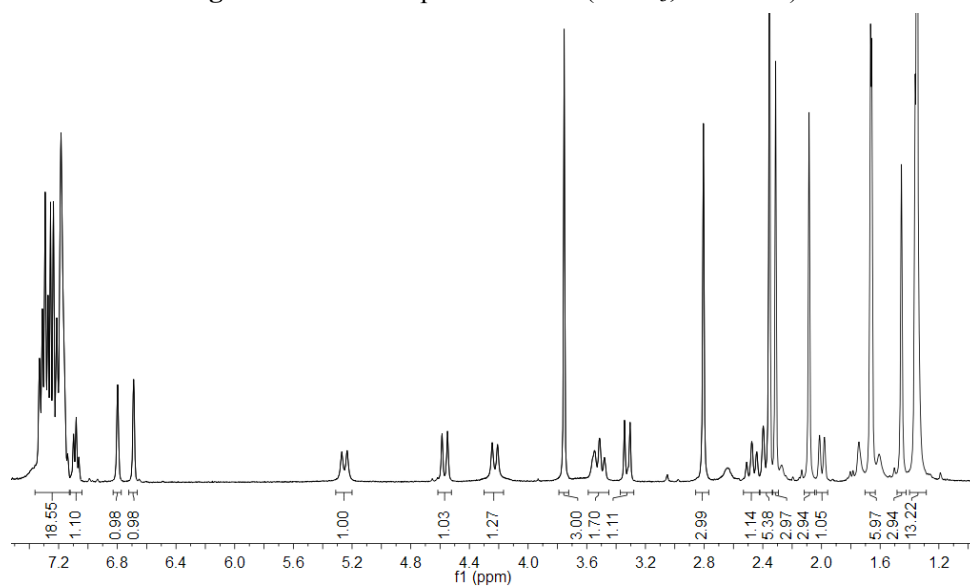

Fig. S16.  $^1\text{H}$  NMR spectrum of **10a** ( $\text{CDCl}_3$ , 400 MHz).

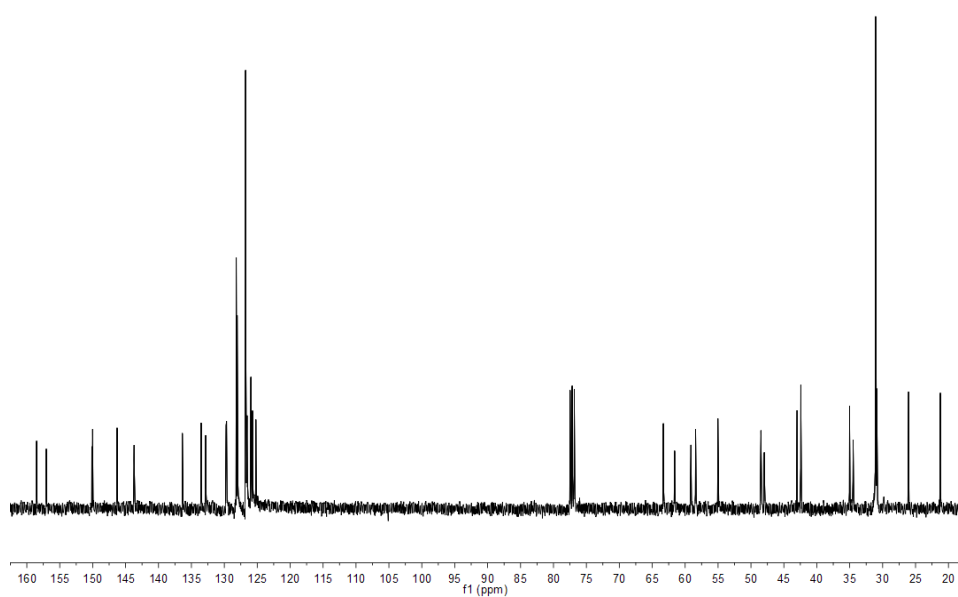

Fig. S17.  $^{13}\text{C}$  NMR spectrum of **10a** ( $\text{CDCl}_3$ , 100 MHz).



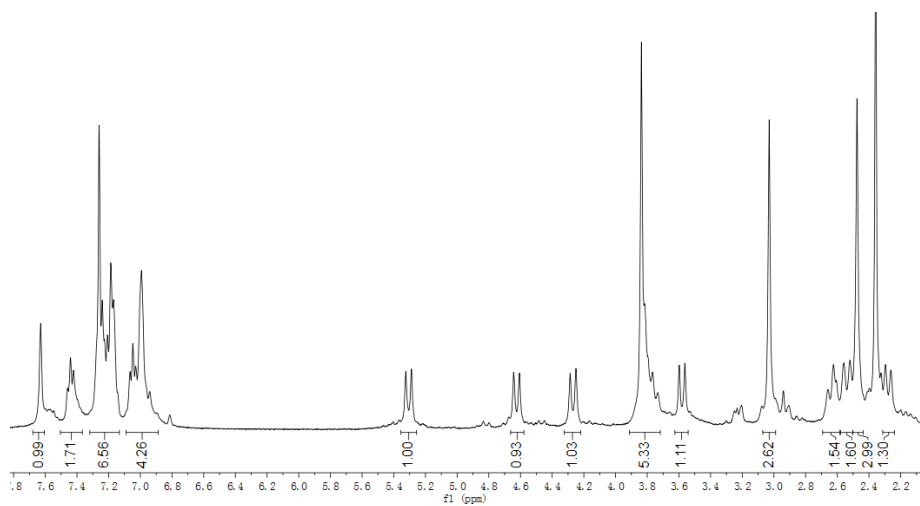

**Fig. S18.**  $^1\text{H}$  NMR spectrum of **8b** ( $\text{CDCl}_3$ , 400 MHz).

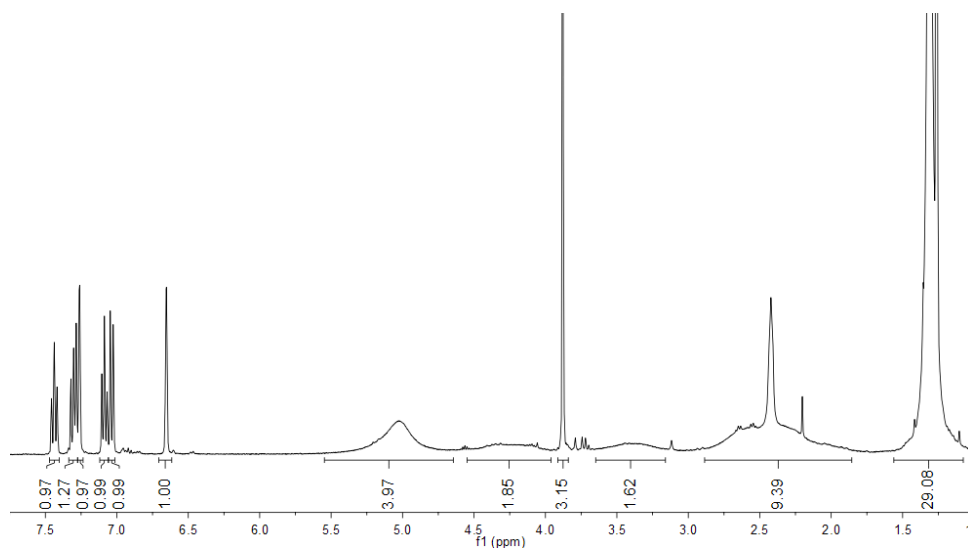

**Fig. S19.**  $^1\text{H}$  NMR spectrum of **5e** ( $\text{CDCl}_3$ , 400 MHz).

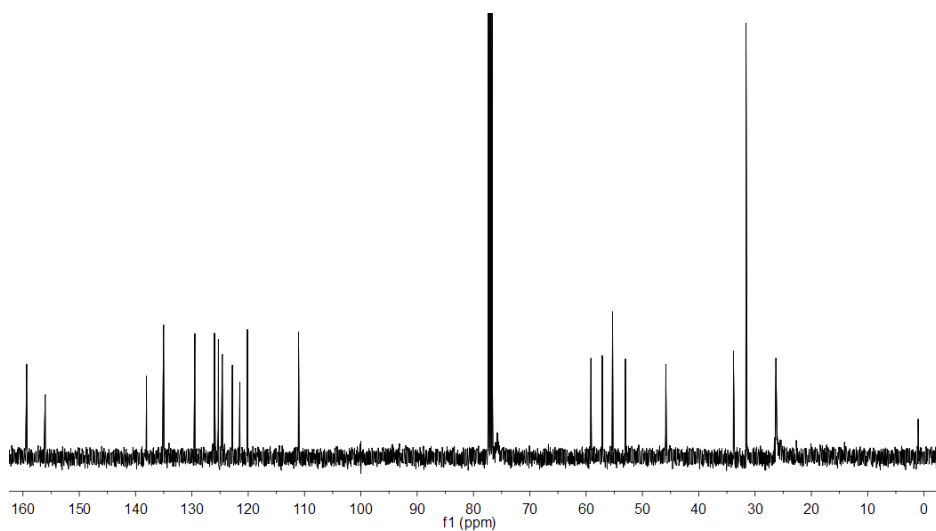

**Fig. S20.**  $^{13}\text{C}$  NMR spectrum of **5e** ( $\text{CDCl}_3$ , 100 MHz).

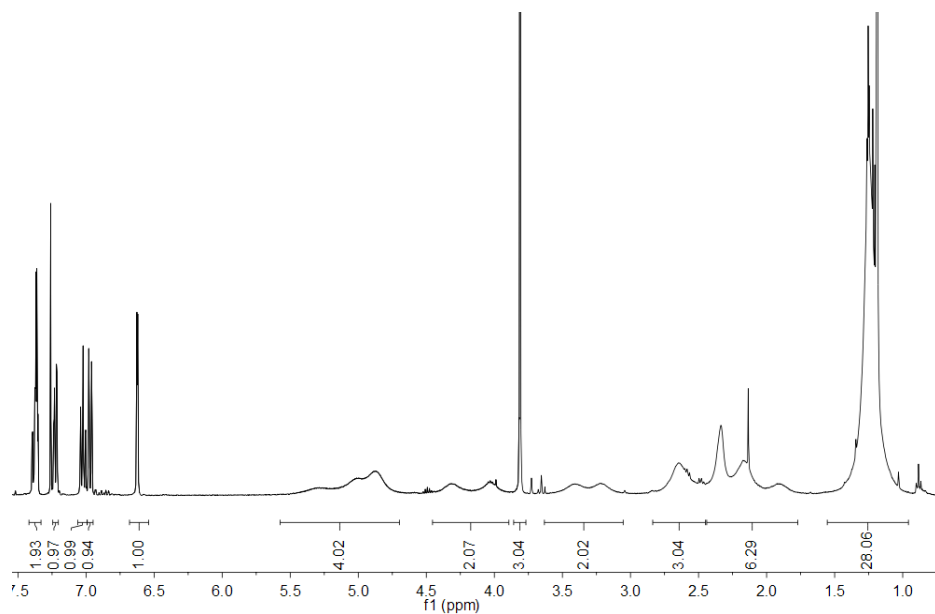

**Fig. S21.**  $^1\text{H}$  NMR spectrum of **6e** ( $\text{CDCl}_3$ , 400 MHz).

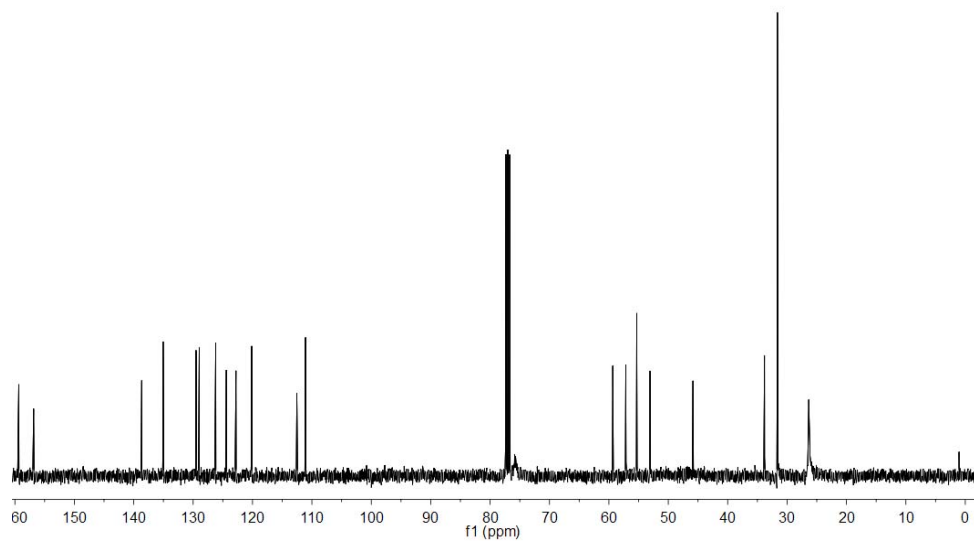

**Fig. S22.**  $^{13}\text{C}$  NMR spectrum of **6e** ( $\text{CDCl}_3$ , 100 MHz).

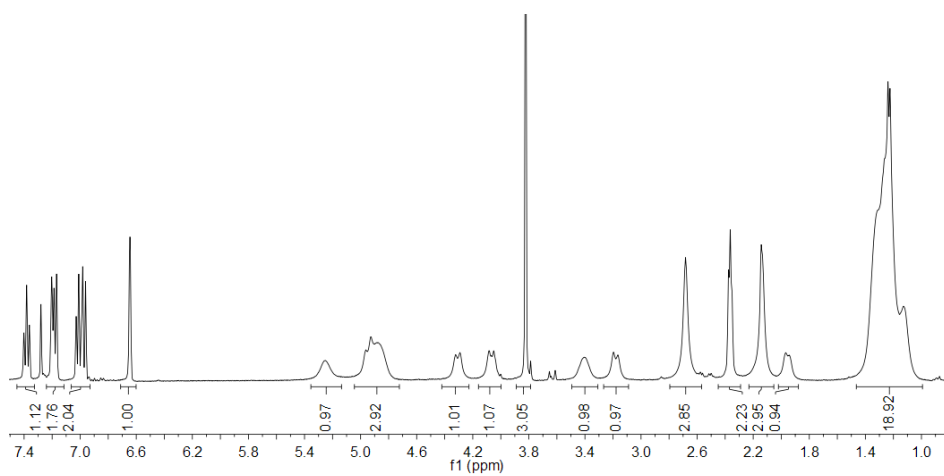

**Fig. S23.**  $^1\text{H}$  NMR spectrum of **7e** ( $\text{CDCl}_3$ , 400 MHz).

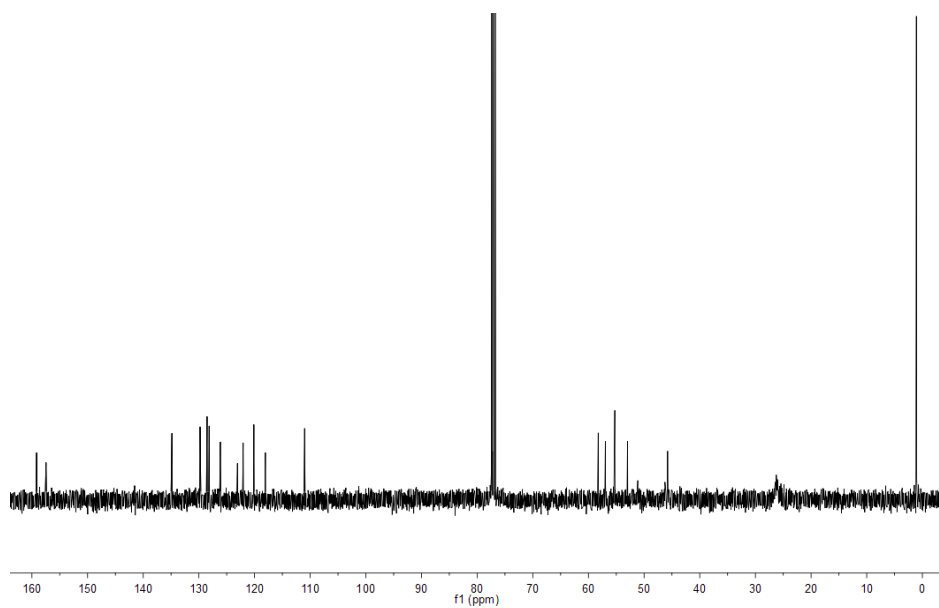

**Fig. S24.**  $^{13}\text{C}$  NMR spectrum of **7e** ( $\text{CDCl}_3$ , 100 MHz).

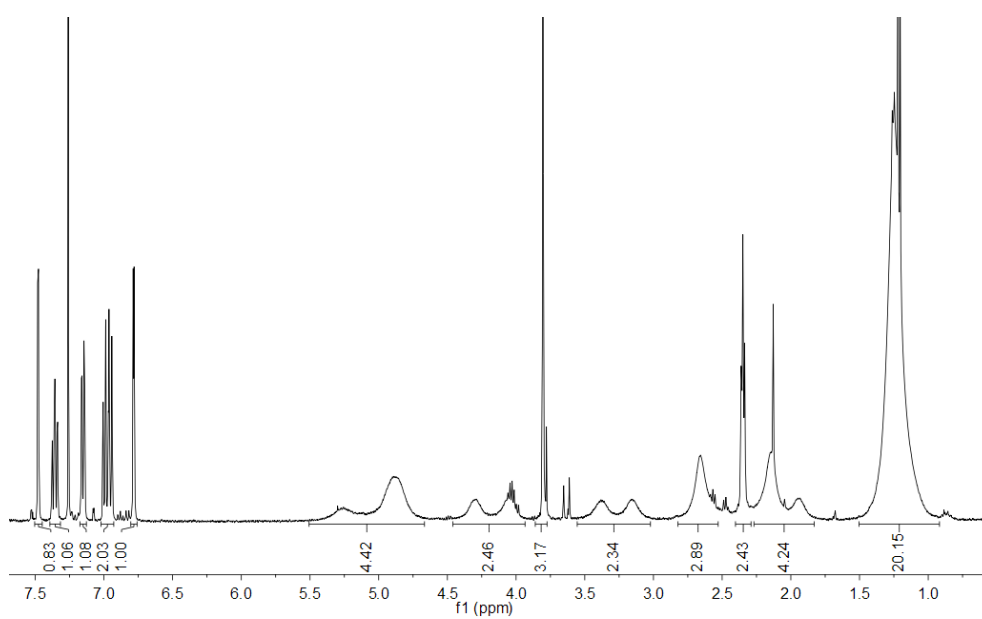

**Fig. S25.**  $^1\text{H}$  NMR spectrum of **8e** ( $\text{CDCl}_3$ , 400 MHz).

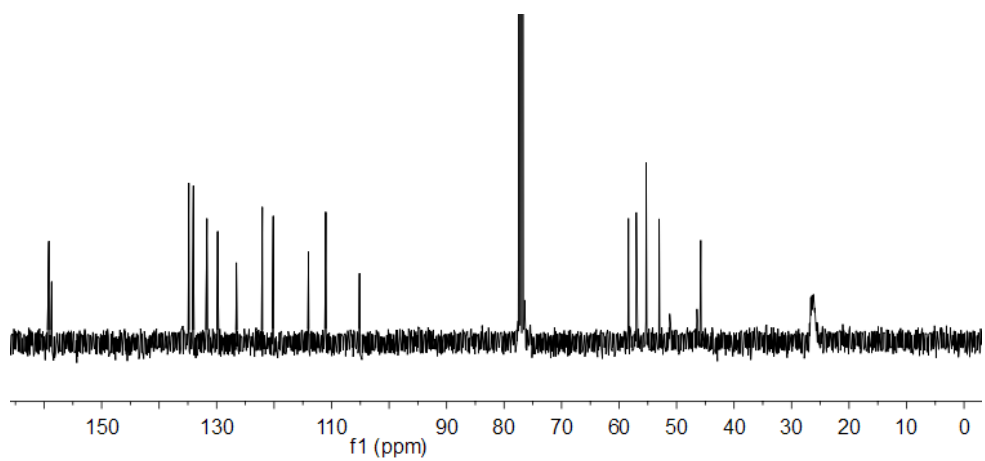

**Fig. S26.**  $^{13}\text{C}$  NMR spectrum of **8e** ( $\text{CDCl}_3$ , 100 MHz).

### 3 Variable temperature $^1\text{H}$ NMR spectra of complex **2a**

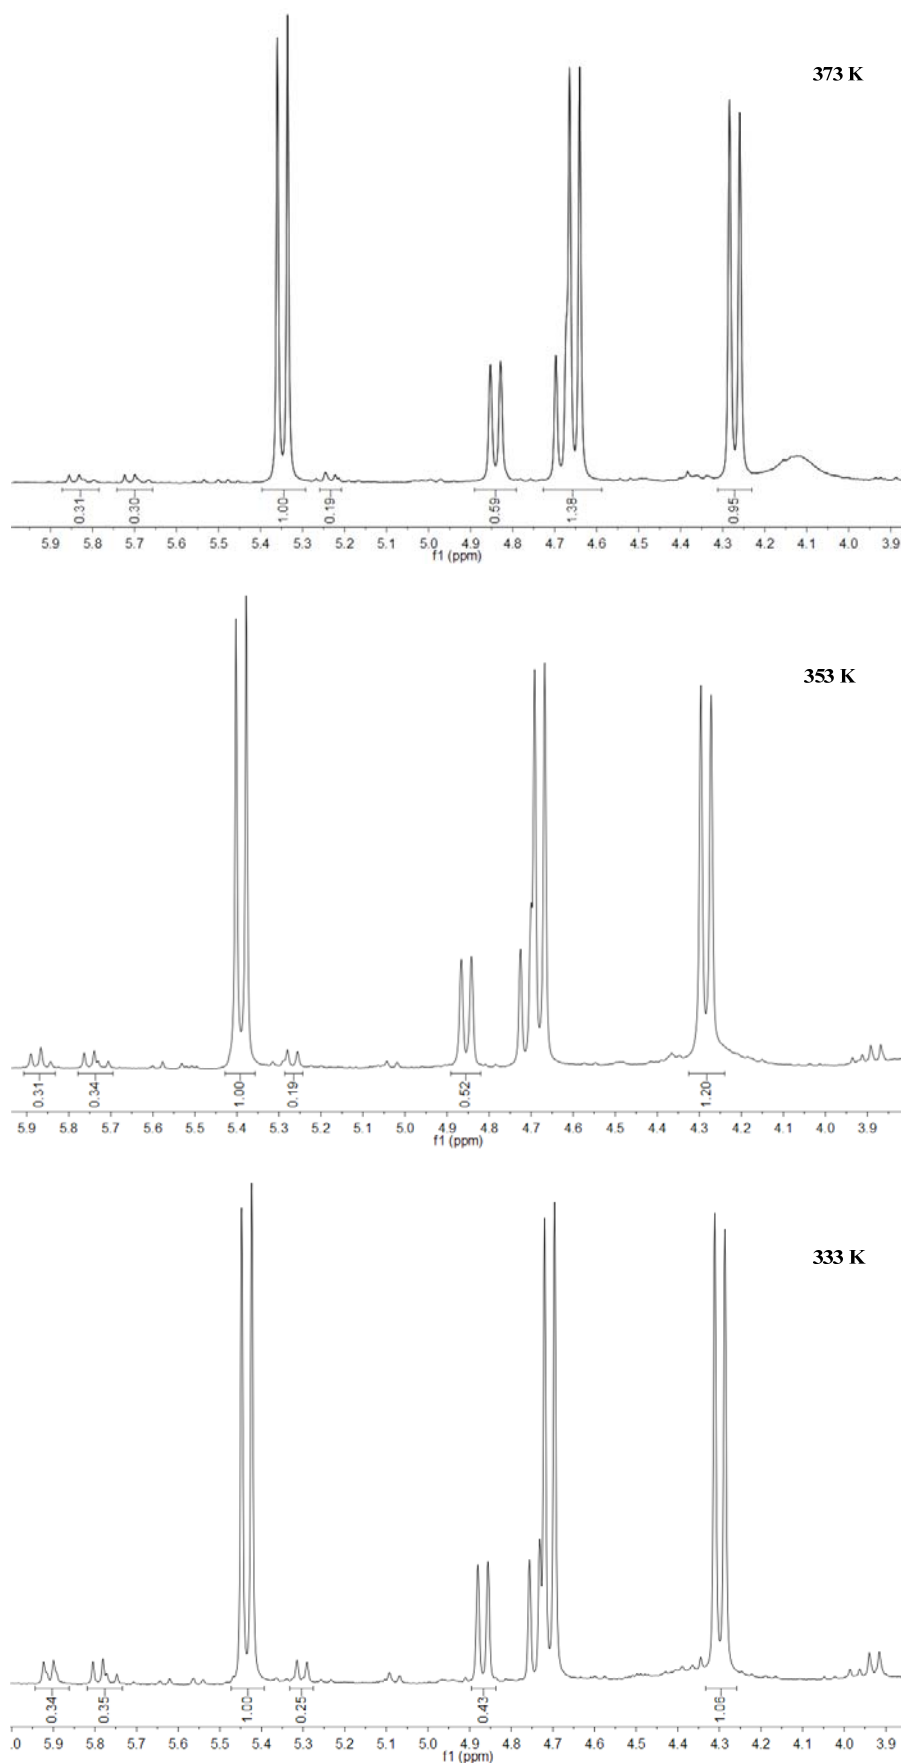

Fig. S27. Variable-temperature  $^1\text{H}$  NMR spectra of **2a** in  $\text{toluene-}d_8$  (partial).

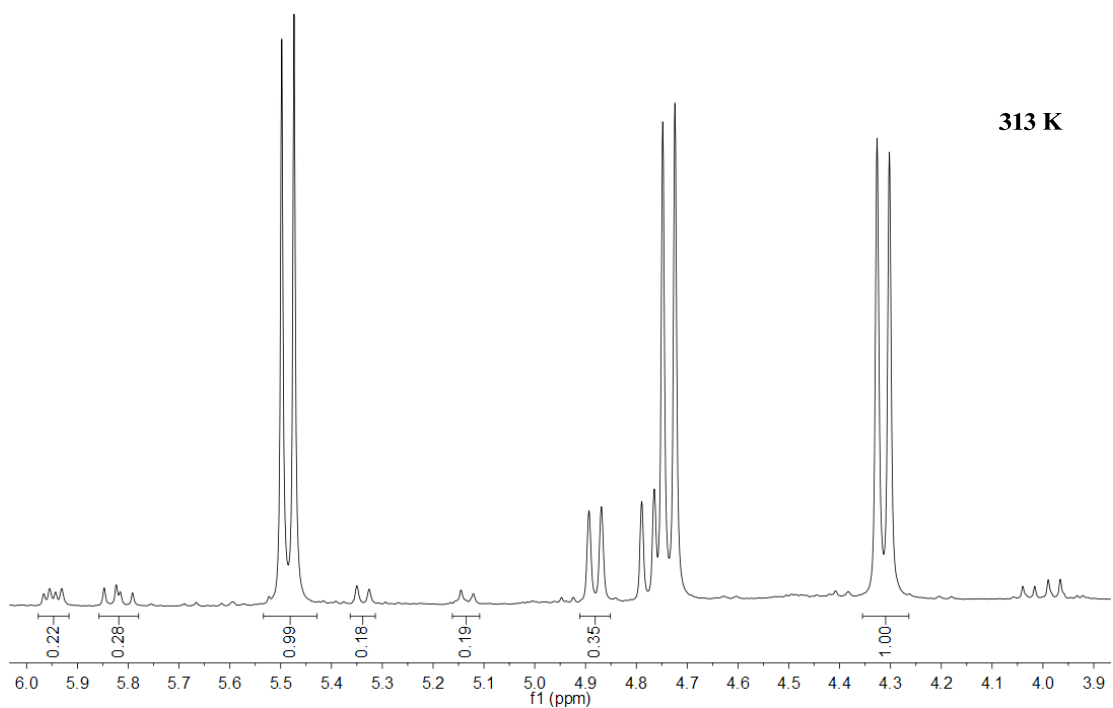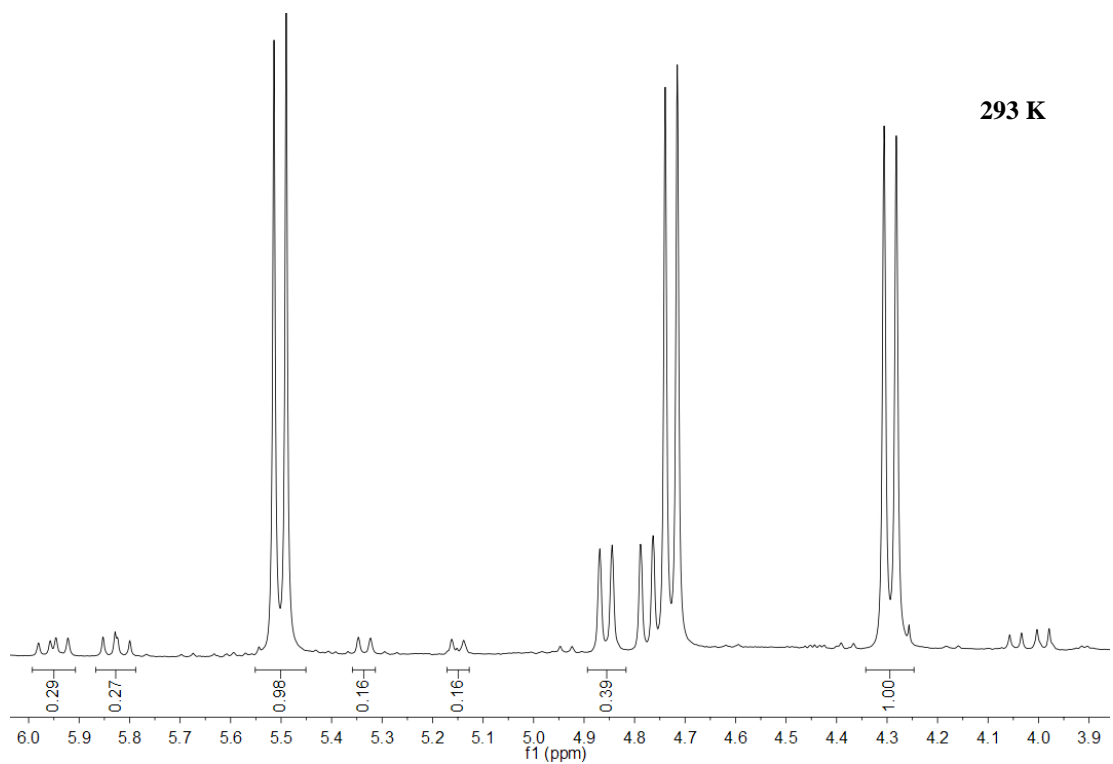

**Fig. S28.** Variable-temperature  $^1\text{H}$  NMR spectra of **2a** in toluene- $d_8$  (partial)

#### 4 Variable temperature $^1\text{H}$ NMR spectra of complex **5e**

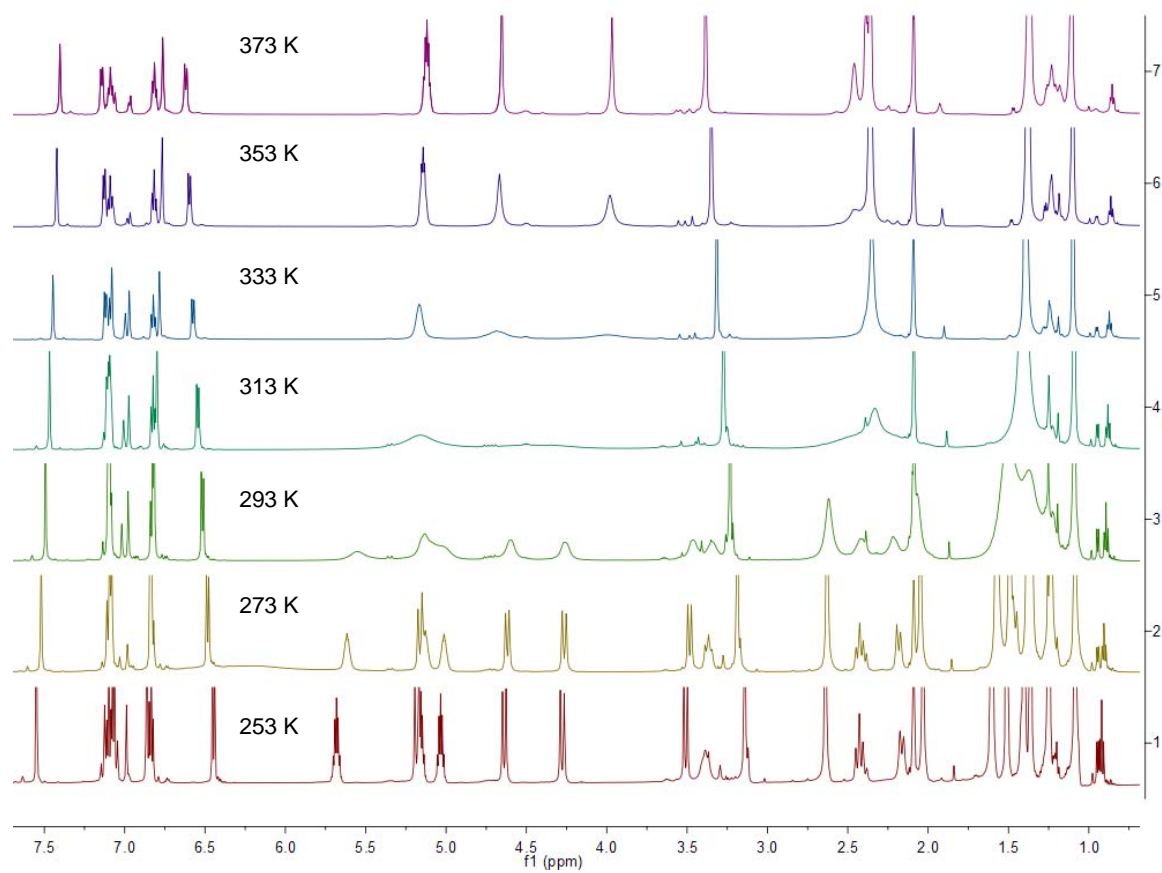

**Fig. S29.** Variable-temperature  $^1\text{H}$  NMR spectra of **5e** in  $\text{toluene-}d_8$

## 5 Ethylene polymerization catalyzed by titanium and zirconium complexes.

**Table S2.** The influence of polymerization temperature on the ethylene polymerization catalyzed by complexes **1a-4a**, **7a**, **9a-10a** and **8b**.<sup>a</sup>

| Entry | Cat.       | Temp (°C) | Al/Ti | PE (mg) | Activity (kg/(mol·M·h)) | $M_n^b$ ( $10^4$ g/mol) | $T_m^c$ (°C) |
|-------|------------|-----------|-------|---------|-------------------------|-------------------------|--------------|
| 1     | <b>1a</b>  | 30        | 1000  | 13      | 78                      | --                      | --           |
| 2     | <b>1a</b>  | 50        | 1000  | 16      | 96                      | --                      | --           |
| 3     | <b>1a</b>  | 80        | 1000  | 30      | 180                     | *                       | --           |
| 4     | <b>2a</b>  | 30        | 1000  | 34      | 204                     | --                      | --           |
| 5     | <b>2a</b>  | 50        | 1000  | 52      | 312                     | --                      | --           |
| 6     | <b>2a</b>  | 80        | 1000  | 61      | 366                     | *                       | 133.4        |
| 7     | <b>3a</b>  | 30        | 1000  | 45      | 330                     | *                       | --           |
| 8     | <b>3a</b>  | 50        | 1000  | 50      | 300                     | *                       | --           |
| 9     | <b>3a</b>  | 80        | 1000  | 59      | 354                     | *                       | --           |
| 10    | <b>4a</b>  | 30        | 1000  | 11      | 66                      | *                       | --           |
| 11    | <b>4a</b>  | 50        | 1000  | 33      | 198                     | *                       | --           |
| 12    | <b>4a</b>  | 80        | 1000  | 45      | 270                     | 38.48                   | --           |
| 13    | <b>7a</b>  | 30        | 1000  | 87      | 522                     | *                       | 134.4        |
| 14    | <b>7a</b>  | 50        | 1000  | 98      | 588                     | *                       | 133.6        |
| 15    | <b>7a</b>  | 80        | 1000  | 119     | 714                     | 58.43                   | 133.8        |
| 16    | <b>9a</b>  | 30        | 1000  | trace   | --                      | --                      | --           |
| 17    | <b>9a</b>  | 50        | 1000  | trace   | --                      | --                      | --           |
| 18    | <b>9a</b>  | 80        | 1000  | 24      | 144                     | --                      | --           |
| 19    | <b>10a</b> | 30        | 1000  | trace   | --                      | --                      | --           |
| 20    | <b>10a</b> | 50        | 1000  | trace   | --                      | --                      | --           |
| 21    | <b>10a</b> | 80        | 1000  | 20      | 120                     | --                      | --           |
| 22    | <b>8b</b>  | 30        | 1000  | 41      | 246                     | *                       | 133.6        |
| 23    | <b>8b</b>  | 50        | 1000  | 87      | 522                     | *                       | 133.7        |
| 24    | <b>8b</b>  | 80        | 1000  | 113     | 678                     | 55.05                   | 134.8        |

<sup>a</sup> Conditions: toluene as solvent, [Cat.] = 0.04  $\mu\text{mol/mL}$ ,  $V_{\text{total}}$  = 25 mL, MMAO as cocatalyst, 1 MPa of ethylene, 10 min; <sup>b</sup> Intrinsic viscosity was determined in decahydronaphthalene at 135 °C by Ubbelohde viscosimeter technique, and the viscosity average molecular weights were calculated using the relation:<sup>96</sup>  $[\eta] = 6.67 \times 10^{-4} M_n^{0.67}$ , in unit of  $10^4$  g/mol; \* insoluble. <sup>c</sup> Determined by DSC at a heating rate of 10 °C  $\text{min}^{-1}$ .

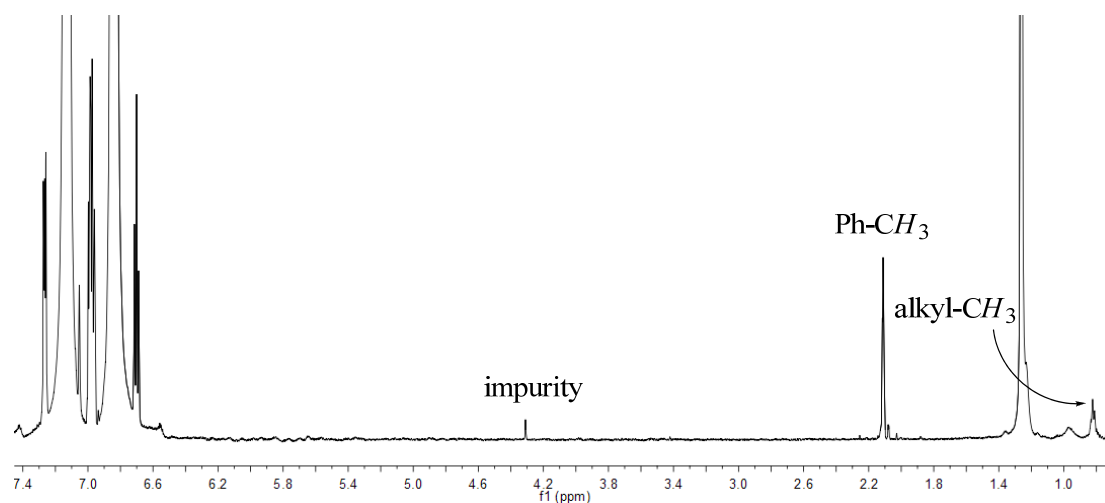

**Fig. S29.**  $^1\text{H}$ NMR spectrum of polymer obtained by complex **8a** (entry 17, 400 MHz,  $o\text{-C}_6\text{H}_4\text{Cl}_2$  :  $\text{C}_6\text{D}_6$  = 4 : 1, 100 °C).
